# Supplementary material for: Phosphorus-doped copper sulfide microspheres with a hollow structure for high-performance sodium-ion batteries
Source: Royal Society of Chemistry journal article supplement (doi:10.1039/d3nj00709j), 2023-01-01
Supplement: d3nj00709j1.pdf [file d3nj00709j1.pdf]

## Supporting Information

### **Phosphorus-doped copper sulfide microspheres with hollow structure for high-performance sodium-ion batteries**

Xinyue Tong, Zhen Wang, Zhaoyang Liu, Biao Yang, Zhenjiang Lu, Jing Xie, Jindou

Hu and Yali Cao\*

*State Key Laboratory of Chemistry and Utilization of Carbon Based Energy Resources, College of Chemistry, Xinjiang University, Urumqi 830017, Xinjiang, P.R. China.*

\*Corresponding author. Tel: +86-991-2111636; Fax: +86-991-2111636; Email: [caoyali523@163.com](mailto:caoyali523@163.com) (Y.L. Cao).

**Materials Characterization:**

The morphology, microstructure and phases of the synthesized products were characterized by SEM (S4800, Hitachi, Japan), TEM (SUPRA 55, Germany) equipped with energy dispersive X-ray spectroscopy (EDS) and XRD (Bruker D8 advance, Cu) with Cu K $\alpha$  of  $\lambda = 0.15417$  nm. XPS was conducted using an X-ray photoelectron spectrometer (Thermo Scientific K-Alpha) with a laser source of  $\lambda = 532$  nm.

**Electrochemical Measurement:**

The working electrode slurry was a mixture of the active material, conductivity agent (ketjen black), and CMC binder with a weight ratio of 80:10:10 using deionized water as solvents. The slurry was uniformly pasted on a copper foil and dried in vacuum at 80°C for 12 h. The coin-type cells (2032) were assembled in an Ar-filled glove box (Mikrouna), where the concentrations of H<sub>2</sub>O and O<sub>2</sub> were maintained below 1 ppm. Sodium metal was used as counter/reference electrode, glass fiber (GF/D) was used as the separator, and 1 M NaPF<sub>6</sub> dissolved in dimethoxyethane (DME) solution as the electrolyte. A LAND-CT2001A battery testing system was used to test galvanostatic charge/discharge at room temperature under different current densities within a potential range of 0.01–3.0 V (vs. Na/Na<sup>+</sup>). Cyclic voltammetry was conducted on an electrochemical workstation (Chenhua, Shanghai, China) in the voltage range of 0.01–3.0 V (vs. Na/Na<sup>+</sup>). Electrochemical impedance spectroscopy (EIS) was carried out by using electrochemical workstation (Chenhua, Shanghai, China) within the frequency range of 100 kHz to 0.01 Hz under open

circuit voltage.

**GITT test information:**

Use the following equation to calculate  $D_{Na^+}$ :

$$D_{Na^+} = \frac{4}{\pi\tau} \left( \frac{m_B V_m}{M_B S} \right)^2 \left( \frac{\Delta E_S}{\Delta E_\tau} \right)^2$$

where  $m_B$  is the mass of active material,  $\tau$  is the pulse duration,  $S$  is the active surface area,  $V_m$  and  $M_B$  represent the molar volume and molecular mass of carbon, respectively.

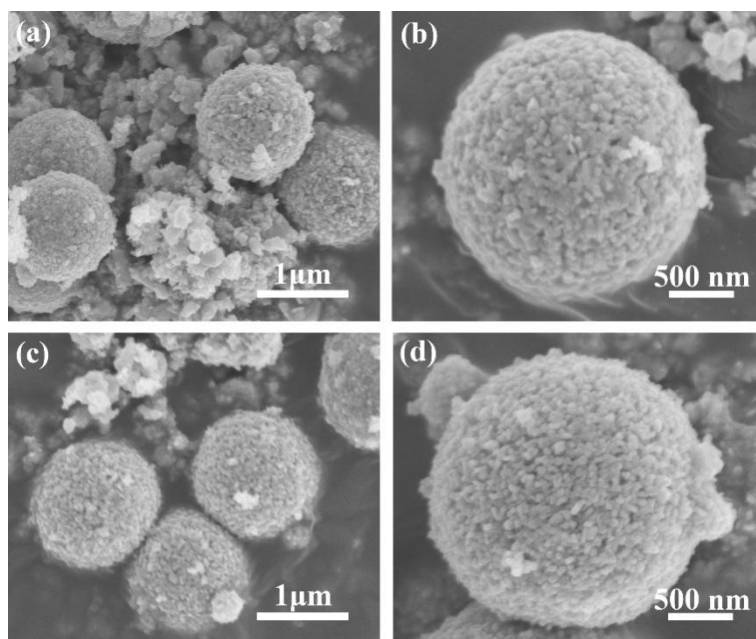

**Fig. S1** SEM images of (a-b) 0.02P-CuS and (c-d) 0.04P-CuS.

**Fig. S2** HRTEM images of (a) 0.03P-CuS and (b) CuS.

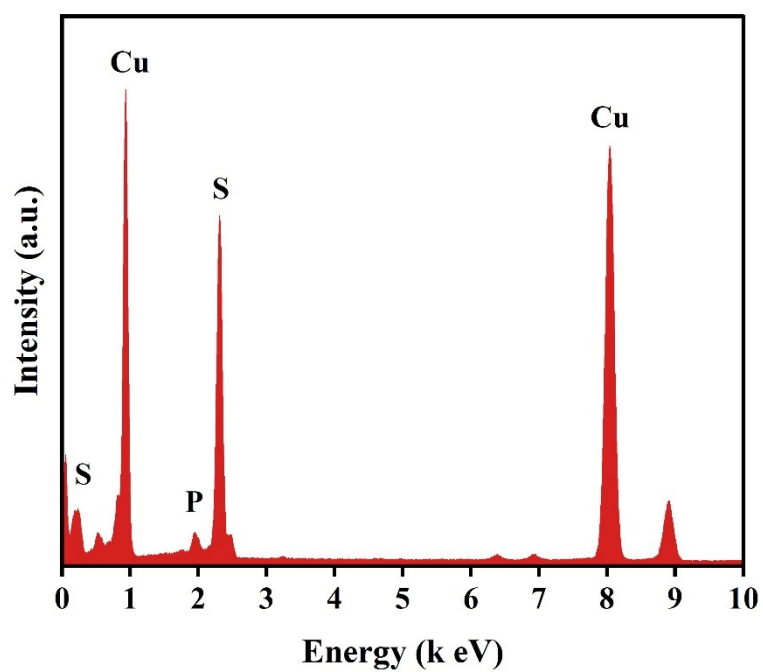

**Fig. S3** Energy dispersive X-ray (EDX) spectrum of 0.03P-CuS.

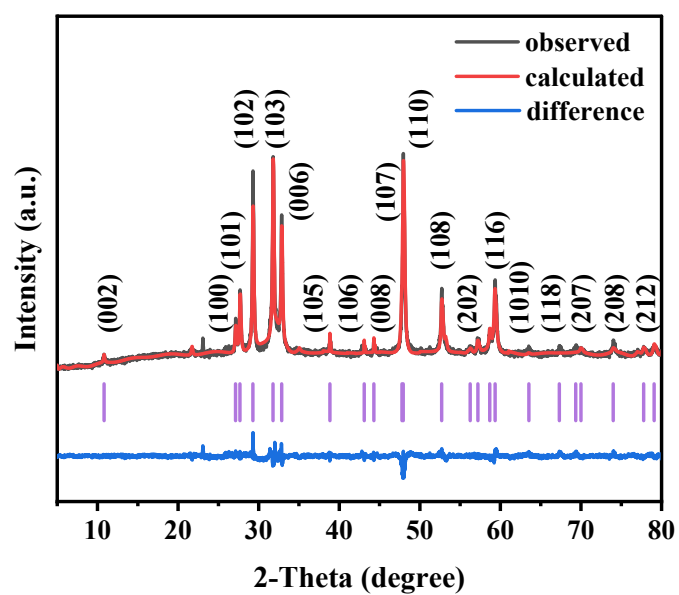

**Fig. S4** XRD pattern and Rietveld refinement.

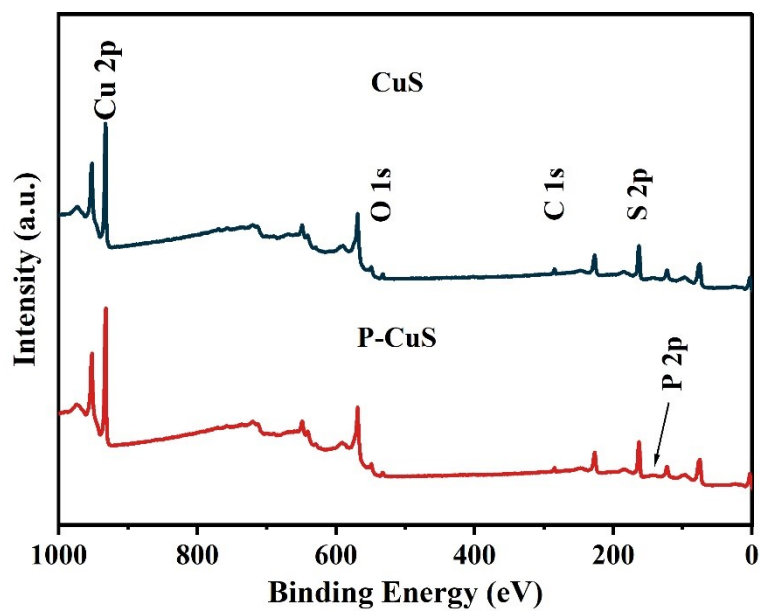

**Fig. S5** XPS survey spectra of CuS and 0.03P-CuS.

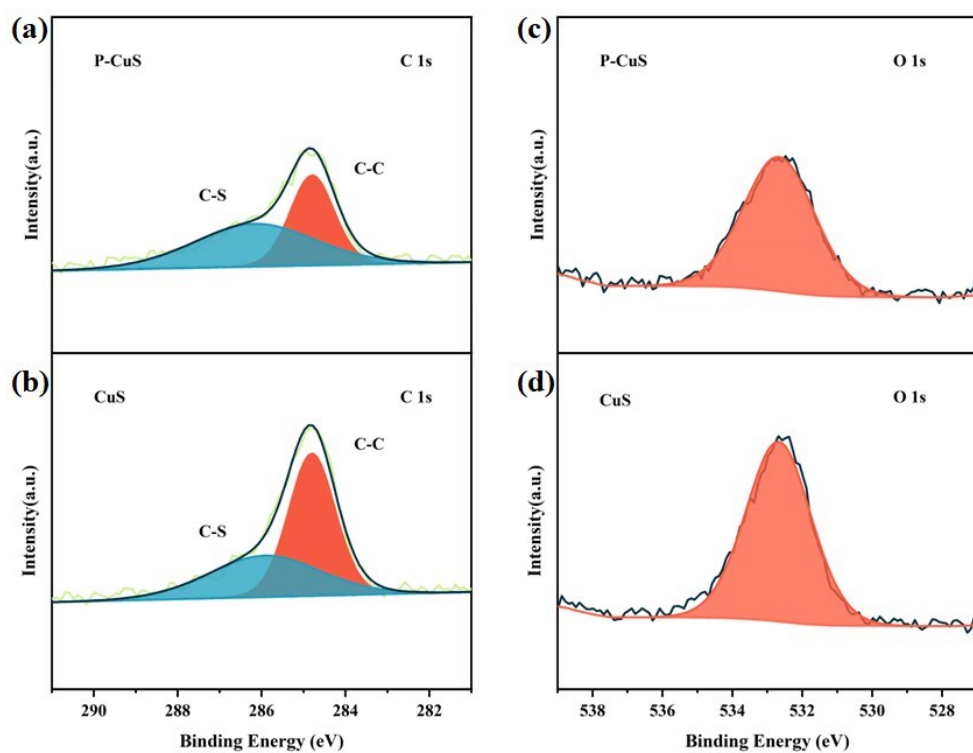

**Fig. S6** High-resolution XPS spectra of (a-b) C 1s and (c-d) O 1s for 0.03P-CuS and

CuS.

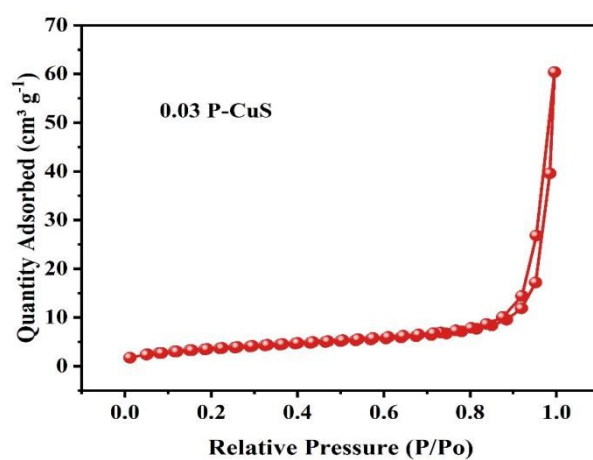

**Fig. S7** N<sub>2</sub> adsorption-desorption isotherms of 0.03P-CuS.

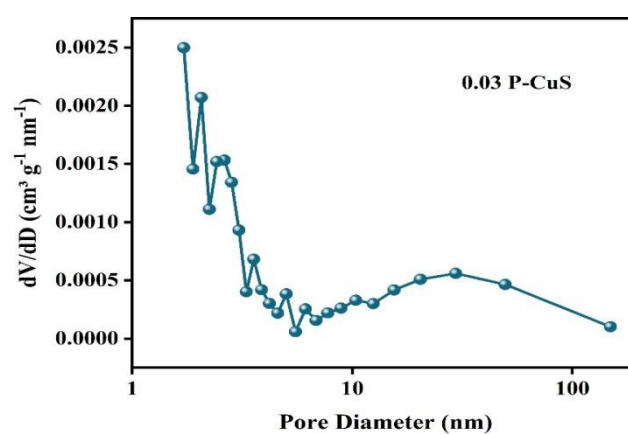

**Fig. S8** Pore size distributions of 0.03P-CuS.

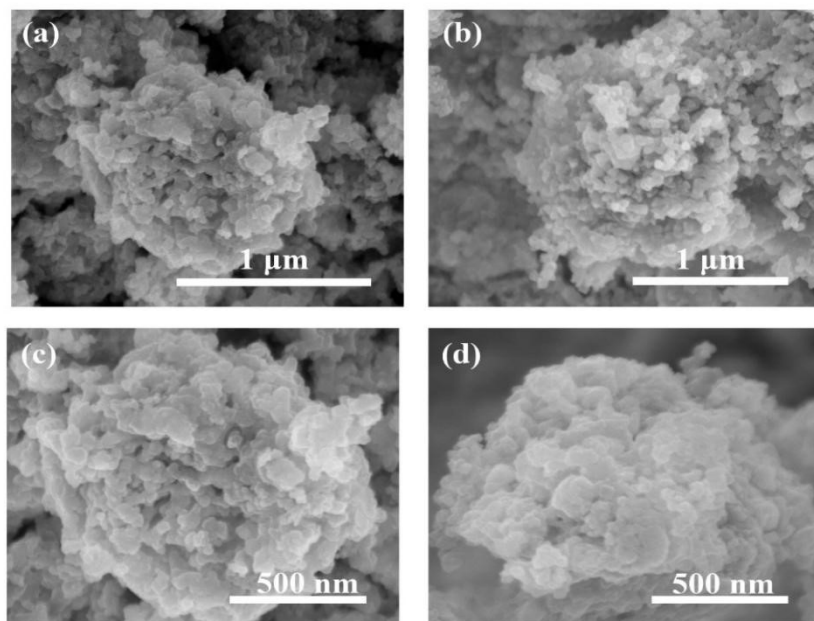

**Fig. S9** SEM images of (a-b) 0.03P-CuS and (c-d) CuS after the electrochemical test.

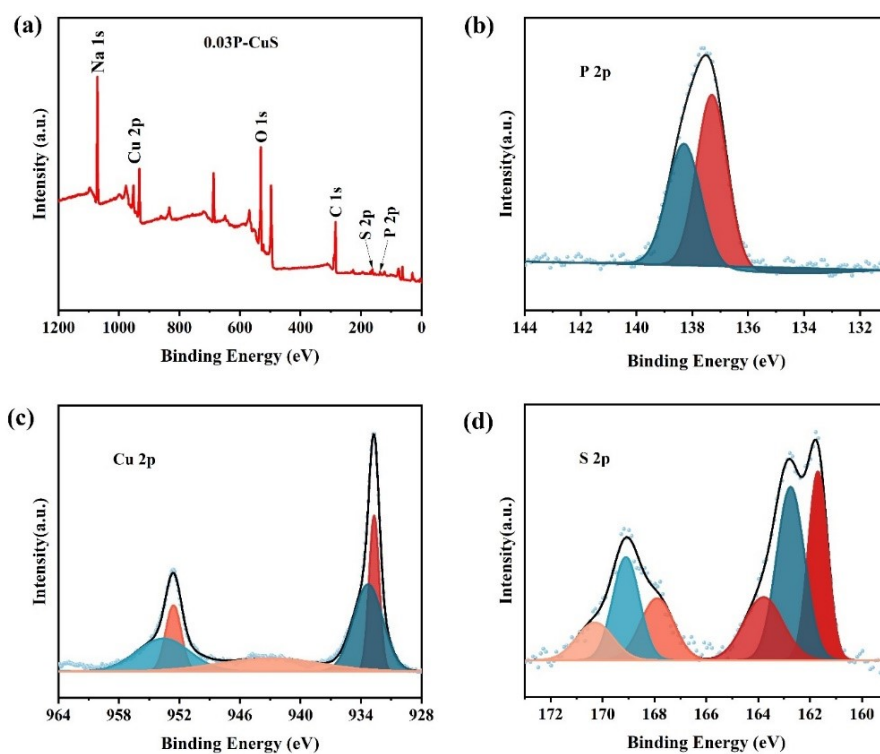

**Fig. S10** (a) XPS survey spectra, high-resolution XPS spectra of (b) P 2p, (c) Cu 2p and (d) S 2p of 0.03P-CuS after the electrochemical test.

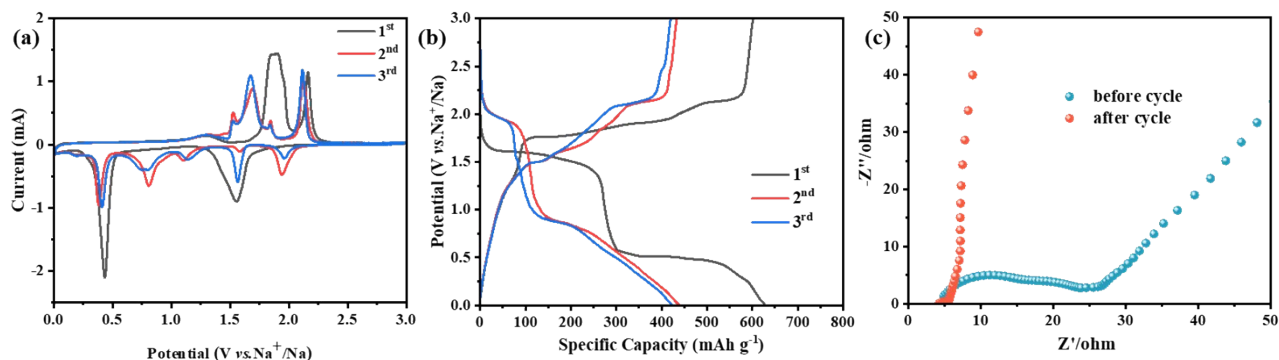

**Fig. S11** (a) CV curves of CuS at  $0.2 \text{ mV s}^{-1}$ ; (b) Galvanostatic charge/discharge curves of CuS at  $0.2 \text{ A g}^{-1}$ ; (c) EIS of the CuS electrode before and after 3 cycles.

**Table S1** Comparison of the electrochemical performance between other reports and our work of P-CuS as anode materials for SIBs.

| Anode materials | Rate performance                                                                                                                                                                                                                                                          | Long-term Cycling performance                                        | Ref. |
|-----------------|---------------------------------------------------------------------------------------------------------------------------------------------------------------------------------------------------------------------------------------------------------------------------|----------------------------------------------------------------------|------|
| CuS             | 514 mAh g <sup>-1</sup> at 0.1 A g <sup>-1</sup><br>377.6 mAh g <sup>-1</sup> at 0.5 A g <sup>-1</sup><br>337.3 mAh g <sup>-1</sup> at 1 A g <sup>-1</sup><br>246.4 mAh g <sup>-1</sup> at 5 A g <sup>-1</sup>                                                            | 361.7 mAh g <sup>-1</sup> after 100 cycles at 0.1 A g <sup>-1</sup>  | [1]  |
| CuS@N-C         | 320.2 mAh g <sup>-1</sup> at 0.2 A g <sup>-1</sup><br>316.2 mAh g <sup>-1</sup> at 1 A g <sup>-1</sup><br>307.8 mAh g <sup>-1</sup> at 2 A g <sup>-1</sup><br>259.4 mAh g <sup>-1</sup> at 5 A g <sup>-1</sup>                                                            | 300.2 mAh g <sup>-1</sup> after 1200 cycles at 5 A g <sup>-1</sup>   | [2]  |
| CuS-Cu@CNTs     | 523.4 mAh g <sup>-1</sup> at 0.08 A g <sup>-1</sup><br>478.9 mAh g <sup>-1</sup> at 0.4 A g <sup>-1</sup><br>464.3 mAh g <sup>-1</sup> at 1.2 A g <sup>-1</sup><br>454.8 mAh g <sup>-1</sup> at 2 A g <sup>-1</sup><br>447.3 mAh g <sup>-1</sup> at 2.4 A g <sup>-1</sup> | 512.5 mAh g <sup>-1</sup> after 1100 cycles at 2.4 A g <sup>-1</sup> | [3]  |
| NaCuS           | 262.0 mAh g <sup>-1</sup> at 0.1 A g <sup>-1</sup><br>121.7 mAh g <sup>-1</sup> at 2 A g <sup>-1</sup>                                                                                                                                                                    | 210.9 mAh g <sup>-1</sup> after 500 cycles at 1 A g <sup>-1</sup>    | [4]  |

|                      |                                                                                                                                                                                                                                                                      |                                                                         |      |
|----------------------|----------------------------------------------------------------------------------------------------------------------------------------------------------------------------------------------------------------------------------------------------------------------|-------------------------------------------------------------------------|------|
| CuS HNs              | 388.1 mAh g <sup>-1</sup> at 1 A g <sup>-1</sup><br>321.4 mAh g <sup>-1</sup> at 3 A g <sup>-1</sup><br>258.2 mAh g <sup>-1</sup> at 10 A g <sup>-1</sup><br>193.4 mAh g <sup>-1</sup> at 20 A g <sup>-1</sup>                                                       | 250.1 mAh g <sup>-1</sup> after 2000<br>cycles at 20 A g <sup>-1</sup>  | [5]  |
| CuS NWs@NC           | 546.2 mAh g <sup>-1</sup> at 0.5 A g <sup>-1</sup><br>496.8 mAh g <sup>-1</sup> at 1 A g <sup>-1</sup><br>402.8 mAh g <sup>-1</sup> at 5 A g <sup>-1</sup><br>350.0 mAh g <sup>-1</sup> at 10 A g <sup>-1</sup><br>294.4 mAh g <sup>-1</sup> at 20 A g <sup>-1</sup> | 216.7 mAh g <sup>-1</sup> after<br>10000 cycles at 20 A g <sup>-1</sup> | [6]  |
| ZnS/CuS@C            | 454.4 mAh g <sup>-1</sup> at 0.1 A g <sup>-1</sup><br>373.6 mAh g <sup>-1</sup> at 1 A g <sup>-1</sup><br>338.2 mAh g <sup>-1</sup> at 5 A g <sup>-1</sup><br>298.9 mAh g <sup>-1</sup> at 10 A g <sup>-1</sup>                                                      | 282.7 mAh g <sup>-1</sup> after 1750<br>cycles at 10 A g <sup>-1</sup>  | [7]  |
| CuS@CuSe             | 513.4 mAh g <sup>-1</sup> at 0.2 A g <sup>-1</sup><br>349.1mAh g <sup>-1</sup> at 20 A g <sup>-1</sup>                                                                                                                                                               | 303.1 mAh g <sup>-1</sup> after 1500<br>cycles at 20 A g <sup>-1</sup>  | [8]  |
| CuS@CoS <sub>2</sub> | 570 mAh g <sup>-1</sup> at 0.2 A g <sup>-1</sup><br>483 mAh g <sup>-1</sup> at 0.5 A g <sup>-1</sup><br>360 mAh g <sup>-1</sup> at 2 A g <sup>-1</sup><br>304 mAh g <sup>-1</sup> at 5 A g <sup>-1</sup>                                                             | 416 mAh g <sup>-1</sup> after 500<br>cycles at 0.5 A g <sup>-1</sup>    | [9]  |
| CuS48                | 329.3 mAh g <sup>-1</sup> at 0.1 A g <sup>-1</sup><br>228.6 mAh g <sup>-1</sup> at 0.5 A g <sup>-1</sup><br>195.7 mAh g <sup>-1</sup> at 1 A g <sup>-1</sup><br>164.6 mAh g <sup>-1</sup> at 2 A g <sup>-1</sup>                                                     | 132.6 mAh g <sup>-1</sup> after 5000<br>cycles at 5 A g <sup>-1</sup>   | [10] |
| PNL-CuS              | 522 mAh g <sup>-1</sup> at 0.1 A g <sup>-1</sup><br>317 mAh g <sup>-1</sup> at 20 A g <sup>-1</sup>                                                                                                                                                                  | 420 mAh g <sup>-1</sup> after 1000<br>cycles at 5 A g <sup>-1</sup>     | [11] |
| CuS                  | 549 mAh g <sup>-1</sup> at 1 A g <sup>-1</sup><br>268 mAh g <sup>-1</sup> at 100 A g <sup>-1</sup>                                                                                                                                                                   | 517 mAh g <sup>-1</sup> after 2000<br>cycles at 5 A g <sup>-1</sup>     | [12] |
| CuS-150              | 470.6 mAh g <sup>-1</sup> at 1 A g <sup>-1</sup><br>386 mAh g <sup>-1</sup> at 5 A g <sup>-1</sup><br>254.7 mAh g <sup>-1</sup> at 20 A g <sup>-1</sup>                                                                                                              | 213mAh g <sup>-1</sup> after 2000<br>cycles at 15 A g <sup>-1</sup>     | [13] |

|       |                                                                                                                                                                                                                |                                                                        |           |
|-------|----------------------------------------------------------------------------------------------------------------------------------------------------------------------------------------------------------------|------------------------------------------------------------------------|-----------|
| P-CuS | 547.2 mAh g <sup>-1</sup> at 0.2 A g <sup>-1</sup><br>504.3mAh g <sup>-1</sup> at 1 A g <sup>-1</sup><br>473.3 mAh g <sup>-1</sup> at 5 A g <sup>-1</sup><br>453.9 mAh g <sup>-1</sup> at 10 A g <sup>-1</sup> | 442.1 mAh g <sup>-1</sup> after 2000<br>cycles at 10 A g <sup>-1</sup> | This work |
|-------|----------------------------------------------------------------------------------------------------------------------------------------------------------------------------------------------------------------|------------------------------------------------------------------------|-----------|

---

## References

1. L. Wu, J. Gao, Z. Qin, Y. Sun, R. Tian, Q. Zhang and Y. Gao, *J. Power Sources* 2020, **479**, 228518.
2. X. Liu, X. Li, X. Lu, X. He, N. Jiang, Y. Huo, C. Xu and D. Lin, *J. Alloys Compd.* 2021, **854**, 157132.
3. Y.-Y. Sun, Y. Li, L.-M. Sheng, T.-L. Lv, R. Guo, T.-R. Yang, Q.-S. Zhang and J.-Y. Xie, *Chem. Eng. J.* 2021, **414**, 128732.
4. Y. Sun, Z. Yu, Z. Chen, H. Wang, P. Wang, S. Han, S. Wu, W. Lu and J. Wang, *Nano Energy* 2021, **84**, 105875.
5. Y. Hu, L. Zhang, J. Bai, F. Liu, Z. Wang, W. Wu, R. Bradley, L. Li, H. Ruan and S. Guo, *ACS Appl. Energy Mater.* 2021, **4**, 8901-8909.
6. D. Zhao, M. Yin, C. Feng, K. Zhan, Q. Jiao, H. Li and Y. Zhao, *ACS Sustain. Chem. Eng.* 2020, **8**, 11317-11327.
7. W. Zhao, L. Gao, L. Yue, X. Wang, Q. Liu, Y. Luo, T. Li, X. Shi, A. M. Asiri and X. Sun, *J. Mater. Chem. A* 2021, **9**, 6402-6412.
8. W. Zhao, X. Wang, X. Ma, L. Yue, Y. Ren, T. Li, J. Xia, L. Zhang, Q. Liu, Y. Luo, N. Li, B. Tang, Y. Liu, S. Gao, A. M. Asiri and X. Sun, *J. Mater. Chem. A* 2021, **9**, 27615-27628.
9. Y. Fang, B. Y. Guan, D. Luan and X. W. Lou, *Angew. Chem. Int. Ed.* 2019, **58**, 7739-7743.
10. C. An, Y. Ni, Z. Wang, X. Li and X. Liu, *Inorg. Chem. Front.* 2018, **5**, 1045-1052.
11. D. Yu, M. Li, T. Yu, C. Wang, Y. Zeng, X. Hu, G. Chen, G. Yang and F. Du, *J. Mater. Chem. A* 2019, **7**, 10619-10628.
12. H. Kim, M. K. Sadan, C. Kim, S.-H. Choe, K.-K. Cho, K.-W. Kim, J.-H. Ahn and

H.-J. Ahn, *J. Mater. Chem. A* 2019, **7**, 16239-16248.

13. L. Zhang, Y. Hu, Y. Liu, J. Bai, H. Ruan and S. Guo, *Ceram. Int.* 2021, **47**, 14138-14145.
